# Supplementary material for: Expression of gynoecium patterning transcription factors in Aristolochia fimbriata (Aristolochiaceae) and their contribution to gynostemium development
Source: PubMed Central journal article supplement (PMC7027301; doi:10.1186/s13227-020-00149-8), 2020-02-17

## Additional File 1

**Table S1.** Plant collections, locations, and statistics from the TRINITY assembly of mixed transcriptomes obtained for each of the members of the perianth-bearing Piperales.

| <b>Species</b>                  | <b>Collection location</b>                                                                                        | <b>Trinity statistics</b>                                                                                                                                                                                                                                                                                                                                                                                                                                                                                       |
|---------------------------------|-------------------------------------------------------------------------------------------------------------------|-----------------------------------------------------------------------------------------------------------------------------------------------------------------------------------------------------------------------------------------------------------------------------------------------------------------------------------------------------------------------------------------------------------------------------------------------------------------------------------------------------------------|
| <i>Asarum canadense</i>         | Living collections at the Arnold Arboretum at Harvard University (Roslindale, MA, USA). Plant ID: 204-2006*MASS-A | Total length of sequence: 106980895 bp<br>Total number of sequences: 103891<br>Average contig length is: 1029 bp<br>Largest contig: 16629 bp<br>Shortest contig: 201 bp<br>N25 stats: 25% of total sequence length is contained in the 7278 sequences $\geq$ 2696 bp<br>N50 stats: 50% of total sequence length is contained in the 19765 sequences $\geq$ 1738 bp<br>N75 stats: 75% of total sequence length is contained in the 40296 sequences $\geq$ 934 bp<br>Total GC count: 46257633 bp<br>GC %: 43.24 % |
| <i>Asarum europaeum</i>         | Living collections at the Arnold Arboretum at Harvard University (Roslindale, MA, USA). Plant ID: 202-2006*MASS   | Total length of sequence: 89804434 bp<br>Total number of sequences: 81419<br>Average contig length is: 1102 bp<br>Largest contig: 16268 bp<br>Shortest contig: 201 bp<br>N25 stats: 25% of total sequence length is contained in the 5951 sequences $\geq$ 2747 bp<br>N50 stats: 50% of total sequence length is contained in the 16149 sequences $\geq$ 1811 bp<br>N75 stats: 75% of total sequence length is contained in the 32230 sequences $\geq$ 1040 bp<br>Total GC count: 38999723 bp<br>GC %: 43.43 %  |
| <i>Aristolochia arborea</i>     | Living collections at the New York Botanical Garden. Enid A Haupt Conservatory (Bronx, NY, USA).                  |                                                                                                                                                                                                                                                                                                                                                                                                                                                                                                                 |
| <i>Aristolochia macrophylla</i> | Living collections at the Arnold Arboretum at Harvard University (Roslindale, MA, USA). Plant ID: 1112-88*A       | Total length of sequence: 164714213 bp<br>Total number of sequences: 126783<br>Average contig length is: 1299 bp<br>Largest contig: 15711 bp<br>Shortest contig: 201 bp<br>N25 stats: 25% of total sequence length is contained in the 9747 sequences $\geq$ 3158 bp                                                                                                                                                                                                                                            |

|                                          |                                                                                                            |                                                                                                                                                                                                                                                                                                                                                                                                                                                                                                                                                                                              |
|------------------------------------------|------------------------------------------------------------------------------------------------------------|----------------------------------------------------------------------------------------------------------------------------------------------------------------------------------------------------------------------------------------------------------------------------------------------------------------------------------------------------------------------------------------------------------------------------------------------------------------------------------------------------------------------------------------------------------------------------------------------|
|                                          |                                                                                                            | <p>N50 stats: 50% of total sequence length is contained in the 25812 sequences <math>\geq</math> 2127 bp</p> <p>N75 stats: 75% of total sequence length is contained in the 50215 sequences <math>\geq</math> 1295 bp</p> <p>Total GC count: 71235570 bp</p> <p>GC %: 43.25 %</p>                                                                                                                                                                                                                                                                                                            |
| <b><i>Aristolochia manshuriensis</i></b> | Living collections at the Arnold Arboretum at Harvard University (Roslindale, MA, USA). Plant ID: 424-87*D | <p>Total length of sequence: 132806117 bp</p> <p>Total number of sequences: 104494</p> <p>Average contig length is: 1270 bp</p> <p>Largest contig: 14862 bp</p> <p>Shortest contig: 201 bp</p> <p>N25 stats: 25% of total sequence length is contained in the 8367 sequences <math>\geq</math> 2993 bp</p> <p>N50 stats: 50% of total sequence length is contained in the 22020 sequences <math>\geq</math> 2021 bp</p> <p>N75 stats: 75% of total sequence length is contained in the 42561 sequences <math>\geq</math> 1253 bp</p> <p>Total GC count: 57846704 bp</p> <p>GC %: 43.56 %</p> |
| <b><i>Saruma henryi</i></b>              | Living collections at The New York Botanical Garden. Rock Garden (Bronx, NY, USA).                         | <p>Total length of sequence: 75298689 bp</p> <p>Total number of sequences: 77163</p> <p>Average contig length is: 975 bp</p> <p>Largest contig: 14509 bp</p> <p>Shortest contig: 201 bp</p> <p>N25 stats: 25% of total sequence length is contained in the 5245 sequences <math>\geq</math> 2620 bp</p> <p>N50 stats: 50% of total sequence length is contained in the 14228 sequences <math>\geq</math> 1711 bp</p> <p>N75 stats: 75% of total sequence length is contained in the 28921 sequences <math>\geq</math> 908 bp</p> <p>Total GC count: 32959129 bp</p> <p>GC %: 43.77 %</p>     |

**Table S2.**

Accession numbers of *CRABS CLAW*, *SPATULA*, *NGATHA*, and *HECATE* homolog sequences used in this study.

| <i>CRABS CLAW</i> sequences |                                   |                  |                                          |              |
|-----------------------------|-----------------------------------|------------------|------------------------------------------|--------------|
| Gene name                   | Species                           | Family           | Accession number                         | Data Base    |
| <i>AmtriCRC</i>             | <i>Amborella trichopoda</i>       | Amborellaceae    | evm_27.model.AmTr_v1.0_scaffold00047.126 | Phytozome    |
| <b>Basal Angiosperms</b>    |                                   |                  |                                          |              |
| Gene name                   | Species                           | Family           | Accession number                         | Data Base    |
| <i>AfimCRC</i>              | <i>Aristolochia fimbriata</i>     | Aristolochiaceae | MN709133                                 | NCBI         |
| <i>ArinCRC</i>              | <i>Aristolochia ringens</i>       | Aristolochiaceae | MN709150                                 | NCBI         |
| <i>AmanCRC</i>              | <i>Aristolochia manshuriensis</i> | Aristolochiaceae | MN709147                                 | NCBI         |
| <i>AmacCRC</i>              | <i>Aristolochia macrophylla</i>   | Aristolochiaceae | MN709143                                 | NCBI         |
| <i>SaheCRC</i>              | <i>Saruma henryi</i>              | Aristolochiaceae | MN709154                                 | NCBI         |
| <i>AeurCRC</i>              | <i>Asarum europaeum</i>           | Aristolochiaceae | MN709140                                 | NCBI         |
| <b>Monocots</b>             |                                   |                  |                                          |              |
| Gene name                   | Species                           | Family           | Accession number                         | Data Base    |
| <i>MusaDL1</i>              | <i>Musa acuminata</i>             | Musaceae         | XM_009393202.2                           | NCBI         |
| <i>MusaDL2</i>              | <i>Musa acuminata</i>             | Musaceae         | XM_018826076.1                           | NCBI         |
| <i>MusaDL3</i>              | <i>Musa acuminata</i>             | Musaceae         | XM_009421461.2                           | NCBI         |
| <i>MusaDL4</i>              | <i>Musa acuminata</i>             | Musaceae         | XM_009407706.2                           | NCBI         |
| <i>OrzaDL</i>               | <i>Oryza sativa</i>               | Poaceae          | XM_015774589.2                           | NCBI         |
| <i>TritCRC</i>              | <i>Triticum aestivum</i>          | Poaceae          | AF545436.2                               | NCBI         |
| <i>SeitCRC</i>              | <i>Setaria italic</i>             | Poaceae          | XM_004985133.4                           | NCBI         |
| <i>SeviCRC</i>              | <i>Setaria viridis</i>            | Poaceae          | Sevir.9G494400.1                         | Phytozome    |
| <i>SbiCRC</i>               | <i>Sorghum bicolor</i>            | Poaceae          | XM_021451449.1                           | NCBI         |
| <i>ZemaDL</i>               | <i>Zea mays</i>                   | Poaceae          | XM_008678090.3                           | NCBI         |
| <b>Basal Eudicots</b>       |                                   |                  |                                          |              |
| Gene name                   | Species                           | Family           | Accession number                         | Data Base    |
| <i>AquCRC</i>               | <i>Aquilegia coerulea</i>         | Ranunculaceae    | Aqcoe3G065300.1                          | Phytozome    |
| <i>EscaCRC</i>              | <i>Eschscholzia californica</i>   | Papaveraceae     | AM946412.1                               | NCBI         |
| <i>PsomCRC</i>              | <i>Papaver somniferum</i>         | Papaveraceae     | XM_026526584.1                           | NCBI         |
| <i>EpisaCRC</i>             | <i>Epimedium sagittatum</i>       | Berberidaceae    | JX560412.1                               | NCBI         |
| <i>ArmeCRC</i>              | <i>Argemone mexicana</i>          | Papaveraceae     |                                          | Phytometazyn |
| <b>Core Eudicots</b>        |                                   |                  |                                          |              |
| Gene name                   | Species                           | Family           | Accession number                         | Data Base    |
| <i>CusaCRC</i>              | <i>Cucumis sativus</i>            | Cucurbitaceae    | XM_011657416.1                           | Phytozome    |
| <i>ViviCRC</i>              | <i>Vitis vinifera</i>             | Vitaceae         | GSVIVT01012246001                        | Phytozome    |
| <i>ThecaCRC</i>             | <i>Theobroma cacao</i>            | Malvaceae        | Thecc1EG011484t1                         | Phytozome    |
| <i>GoraCRC</i>              | <i>Gossypium raimondii</i>        | Malvaceae        | Gorai.005G146700.1                       | Phytozome    |
| <i>EugrCRC</i>              | <i>Eucalyptus grandis</i>         | Myrtaceae        | Eucgr.B03140.1                           | Phytozome    |
| <i>CicleCRC</i>             | <i>Citrus clementina</i>          | Rutaceae         | Ciclev10033770m                          | Phytozome    |
| <i>CapaCRC</i>              | <i>Carica papaya</i>              | Caricaceae       | evm.TU.contig_30608.1                    | Phytozome    |
| <i>FraveCRC</i>             | <i>Fragaria vesca</i>             | Rosaceae         | mrna04566.1-v1.0-hybrid                  | Phytozome    |
| <i>PrupeCRC</i>             | <i>Prunus persica</i>             | Rosaceae         | Prupe.1G290100.1                         | Phytozome    |
| <i>MadoCRC1</i>             | <i>Malus domestica</i>            | Rosaceae         | MDP0000291729                            | Phytozome    |

|                  |                             |              |                      |           |
|------------------|-----------------------------|--------------|----------------------|-----------|
| <i>MadoCRC2</i>  | <i>Malus domestica</i>      | Rosaceae     | MDP0000171878        | Phytozome |
| <i>LiusCRC</i>   | <i>Linum usitatissimum</i>  | Linaceae     | Lus10000644          | Phytozome |
| <i>MetruCRC</i>  | <i>Medicago truncatula</i>  | Fabaceae     | Medtr5g046230.1      | Phytozome |
| <i>GlymaCRC1</i> | <i>Glycine max</i>          | Fabaceae     | Glyma.02G121100.1    | Phytozome |
| <i>GlymaCRC2</i> | <i>Glycine max</i>          | Fabaceae     | Glyma.01G063500.1    | Phytozome |
| <i>CleosCRC</i>  | <i>Cleome sparsifolia</i>   | Cleomaceae   | AY854803.1           | NCBI      |
| <i>MiguCRC</i>   | <i>Mimulus guttatus</i>     | Phrymaceae   | Migut.E00040.1       | Phytozome |
| <i>BraraCRC</i>  | <i>Brassica rapa</i>        | Brassicaceae | Brara.G02853.1       | Phytozome |
| <i>AthCRC</i>    | <i>Arabidopsis thaliana</i> | Brassicaceae | AT1G69180.1          | TAIR      |
| <i>AlyrCRC</i>   | <i>Arabidopsis lyrata</i>   | Brassicaceae | AL2G28270.t1         | Phytozome |
| <i>LeafCRC</i>   | <i>Lepidium africanum</i>   | Brassicaceae | AY854802.1           | NCBI      |
| <i>BoesCRC</i>   | <i>Boechera stricta</i>     | Brassicaceae | Bostr.10273s0455.1   | Phytozome |
| <i>CaruCRC</i>   | <i>Capsella rubella</i>     | Brassicaceae | Carubv10021641m      | Phytozome |
| <i>CagraCRC</i>  | <i>Capsella grandiflora</i> | Brassicaceae | Cagra.0537s0004.1    | Phytozome |
| <i>SolyCRC1</i>  | <i>Solanum lycopersicum</i> | Solanaceae   | Solyc05g012050.2     | Phytozome |
| <i>SolyCRC2</i>  | <i>Solanum lycopersicum</i> | Solanaceae   | Solyc01g010240.2.1   | Phytozome |
| <i>SotuCRC</i>   | <i>Solanum tuberosum</i>    | Solanaceae   | PGSC0003DMT400072893 | Phytozome |
| <i>NitaCRC</i>   | <i>Nicotiana tabacum</i>    | Solanaceae   | AY854800.1           | NCBI      |
| <i>PetCRC</i>    | <i>Petunia x hybrida</i>    | Solanaceae   | AY854801.1           | NCBI      |

| <i>SPATULA-ALCATRAZ sequences</i> |                                       |                   |                  |           |
|-----------------------------------|---------------------------------------|-------------------|------------------|-----------|
| Gene name                         | Species                               | Family            | Accession number | Data Base |
| <i>CymicSPT</i>                   | <i>Cycas micholitzii</i><br>(Outgrup) | Cycadaceae        | XZUY-2049748     | OneKP     |
| <b>Gymnosperms</b>                |                                       |                   |                  |           |
| Gene name                         | Species                               | Family            | Accession number | Data Base |
| <i>SunamSPT</i>                   | <i>Sundacarpus amarus</i>             | Podocarpaceae     | KLGF-2092082     | OneKP     |
| <i>TotaSPT</i>                    | <i>Torreya taxifolia</i>              | Taxaceae          | EFMS-2015503     | OneKP     |
| <b>Basal Angiosperms</b>          |                                       |                   |                  |           |
| Gene name                         | Species                               | Family            | Accession number | Data Base |
| <i>AmtrSPT</i>                    | <i>Amborella trichopoda</i>           | Amborellaceae     | URDJ-2004099     | OneKP     |
| <i>AuscSPT</i>                    | <i>Austrobaileya scandens</i>         | Austrobaileyaceae | FZJL-2164770     | OneKP     |
| <i>SarglSPT</i>                   | <i>Sarcandra glabra</i>               | Chloranthaceae    | QSHQ-2009866     | OneKP     |
| <i>AscrSPT</i>                    | <i>Ascarina rubricaulis</i>           | Chloranthaceae    | WZFE-2194308     | OneKP     |
| <i>AfimSPT</i>                    | <i>Aristolochia fimbriata</i>         | Aristolochiaceae  | MN709134         | NCBI      |
| <i>AeleSPT</i>                    | <i>Aristolochia elegans</i>           | Aristolochiaceae  | PAWA-2009790     | OneKP     |
| <i>ArinSPT</i>                    | <i>Aristolochia ringens</i>           | Aristolochiaceae  | MN709151         | NCBI      |
| <i>AarSPT</i>                     | <i>Aristolochia arborea</i>           | Aristolochiaceae  | MN709136         | NCBI      |
| <i>AmanSPT</i>                    | <i>Aristolochia manshuriensis</i>     | Aristolochiaceae  | MN709148         | NCBI      |
| <i>AmacSPT</i>                    | <i>Aristolochia macrophylla</i>       | Aristolochiaceae  | MN709144         | NCBI      |
| <b>Monocots</b>                   |                                       |                   |                  |           |
| Gene name                         | Species                               | Family            | Accession number | Data Base |
| <i>HydeSPT</i>                    | <i>Hypoxis decumbens</i>              | Hypoxidaceae      | KY421366         | NCBI      |
| <i>LepgiSPT</i>                   | <i>Lepidosperma gibsonii</i>          | Cyperaceae        | WBIB-2064717     | OneKP     |
| <i>ZemaSPT1</i>                   | <i>Zea mays</i>                       | Poaceae           | GRMZM2G017349    | Phytozome |
| <i>ZemaSPT2</i>                   | <i>Zea mays</i>                       | Poaceae           | GRMZM2G030744    | Phytozome |

|                  |                                 |               |                         |                  |
|------------------|---------------------------------|---------------|-------------------------|------------------|
| <i>SobiSPT1</i>  | <i>Sorghum bicolor</i>          | Poaceae       | Sb10g004500             | Phytozome        |
| <i>SobiSPT2</i>  | <i>Sorghum bicolor</i>          | Poaceae       | Sb04g036450             | Phytozome        |
| <i>OrysaSPT1</i> | <i>Oryza sativa</i>             | Poaceae       | LOC-Os06g06900          | Phytozome        |
| <i>OrysaSPT2</i> | <i>Oryza sativa</i>             | Poaceae       | LOC-Os02g56140          | Phytozome        |
|                  |                                 |               |                         |                  |
|                  | <b>Basal Eudicots</b>           |               |                         |                  |
| <b>Gene name</b> | <b>Species</b>                  | <b>Family</b> | <b>Accession number</b> | <b>Data Base</b> |
| <i>AquSPT</i>    | <i>Aquilegia coerulea</i>       | Ranunculaceae | Aquca-007-007-02        | Phytozome        |
| <i>BofrSPT1</i>  | <i>Bocconia frutescens</i>      | Papaveraceae  | KY421363                | NCBI             |
| <i>BofrSPT2</i>  | <i>Bocconia frutescens</i>      | Papaveraceae  | KY421364                | NCBI             |
| <i>BofrSPT3</i>  | <i>Bocconia frutescens</i>      | Papaveraceae  | KY421365                | NCBI             |
| <i>ArgmeSPT</i>  | <i>Argemone mexicana</i>        | Papaveraceae  | IRAF-2111869            | OneKP            |
| <i>ParhoSPT</i>  | <i>Papaver rhoeas</i>           | Papaveraceae  | MVTX-2101636            | OneKP            |
| <i>PasetSPT</i>  | <i>Papaver setigerum</i>        | Papaveraceae  | MLPX-2019231            | OneKP            |
| <i>PsomSPT</i>   | <i>Papaver somniferum</i>       | Papaveraceae  | RQNK-2019222            | OneKP            |
| <i>EscaSPT</i>   | <i>Eschscholzia californica</i> | Papaveraceae  | EVOD-2110824            | OneKP            |
|                  |                                 |               |                         |                  |
|                  | <b>Core Eudicots</b>            |               |                         |                  |
| <b>Gene name</b> | <b>Species</b>                  | <b>Family</b> | <b>Accession number</b> | <b>Data Base</b> |
| <i>FraveSPT</i>  | <i>Fragaria vesca</i>           | Rosaceae      |                         | Phytozome        |
| <i>PpSPT</i>     | <i>Prunus persica</i>           | Rosaceae      | Prupe.7G131400.1        | Phytozome        |
| <i>AthaSPT</i>   | <i>Arabidopsis thaliana</i>     | Brassicaceae  | AT4G36930               | Phytozome        |
| <i>AlyrSPT</i>   | <i>Arabidopsis lyrata</i>       | Brassicaceae  | 353119                  | Phytozome        |
| <i>BraraSPT1</i> | <i>Brassica rapa</i>            | Brassicaceae  | Bra011740               | Phytozome        |
| <i>BraraSPT2</i> | <i>Brassica rapa</i>            | Brassicaceae  | Bra010591               | Phytozome        |
| <i>SotuSPT</i>   | <i>Solanum tuberosum</i>        | Solanaceae    | PGSC0003DMT400010253    | Phytozome        |
| <i>SolySPT</i>   | <i>Solanum lycopersicum</i>     | Solanaceae    | Solyc02g093280.2        | Phytozome        |
| <i>ViviALC</i>   | <i>Vitis vinifera</i>           | Vitaceae      | GSVIVT01022111001       | Phytozome        |
| <i>BraraALC</i>  | <i>Brassica rapa</i>            | Brassicaceae  | Brara.G01197.1          | Phytozome        |
| <i>BraoALC</i>   | <i>Brassica oleraceae</i>       | Brassicaceae  | Bol027228               | Phytozome        |
| <i>AthaSPT</i>   | <i>Arabidopsis thaliana</i>     | Brassicaceae  | AT5G67110               | TAIR             |
| <i>AlyrSPT</i>   | <i>Arabidopsis lyrata</i>       | Brassicaceae  | AL8G44250.t1            | Phytozome        |
| <i>CapruALC</i>  | <i>Capsella rubella</i>         | Brassicaceae  | Carubv10028570m         | Phytozome        |
| <i>CagraALC</i>  | <i>Capsella grandiflora</i>     | Brassicaceae  | Cagra.2428s0008.1       | Phytozome        |

| <i>NGATHA sequences</i> |                                 |                  |                         |                  |
|-------------------------|---------------------------------|------------------|-------------------------|------------------|
|                         | <b>Outgroup</b>                 |                  |                         |                  |
| <b>Gene name</b>        | <b>Species</b>                  | <b>Family</b>    | <b>Accession number</b> | <b>Data Base</b> |
| <i>AtRAVI</i>           | <i>Arabidopsis thaliana</i>     | Brassicaceae     | AT1G13260.1             | TAIR             |
|                         |                                 |                  |                         |                  |
|                         | <b>Basal Angiosperms</b>        |                  |                         |                  |
| <b>Gene name</b>        | <b>Species</b>                  | <b>Family</b>    | <b>Accession number</b> | <b>Data Base</b> |
| <i>AfimNGA</i>          | <i>Aristolochia fimbriata</i>   | Aristolochiaceae | MN709130                | NCBI             |
| <i>ArelNGA</i>          | <i>Aristolochia elegans</i>     | Aristolochiaceae | PAWA-2008421            | OneKP            |
| <i>SaheNGA</i>          | <i>Saruma henryi</i>            | Aristolochiaceae | QDVW-2013083            | OneKP            |
| <i>ArinNGA</i>          | <i>Aristolochia ringens</i>     | Aristolochiaceae | MN709149                | NCBI             |
| <i>AarNGA</i>           | <i>Aristolochia arborea</i>     | Aristolochiaceae | MN709135                | NCBI             |
| <i>AmacNGA</i>          | <i>Aristolochia macrophylla</i> | Aristolochiaceae | MN709141                | NCBI             |
| <i>AeurNGA</i>          | <i>Asarum europaeum</i>         | Aristolochiaceae | MN709137                | NCBI             |
|                         |                                 |                  |                         |                  |
|                         | <b>Monocots</b>                 |                  |                         |                  |
| <b>Gene name</b>        | <b>Species</b>                  | <b>Family</b>    | <b>Accession number</b> | <b>Data Base</b> |

|                   |                                 |               |                         |                  |
|-------------------|---------------------------------|---------------|-------------------------|------------------|
| <i>OryNGA1</i>    | <i>Oryza sativa</i>             | Poaceae       | LOC_Os03g02900.1        | Phytozome        |
| <i>OryNGA2</i>    | <i>Oryza sativa</i>             | Poaceae       | LOC_Os02g45850.1        | Phytozome        |
| <i>OryNGA3</i>    | <i>Oryza sativa</i>             | Poaceae       | LOC_Os12g06080.1        | Phytozome        |
| <i>OryNGA4</i>    | <i>Oryza sativa</i>             | Poaceae       | LOC_Os11g05740.1        | Phytozome        |
| <i>BradNGA1</i>   | <i>Brachypodium distachyon</i>  | Poaceae       | Bradi5g19260.2          | Phytozome        |
| <i>BradNGA2</i>   | <i>Brachypodium distachyon</i>  | Poaceae       | Bradi3g51840.3          | Phytozome        |
| <i>BradNGA3</i>   | <i>Brachypodium distachyon</i>  | Poaceae       | Bradi2g47220.1          | Phytozome        |
| <i>BradNGA4</i>   | <i>Brachypodium distachyon</i>  | Poaceae       | Bradi1g77150.1          | Phytozome        |
| <i>BradNGA5</i>   | <i>Brachypodium distachyon</i>  | Poaceae       | Bradi4g25170.1          | Phytozome        |
| <i>BradNGA6</i>   | <i>Brachypodium distachyon</i>  | Poaceae       | Bradi3g32140.1          | Phytozome        |
| <i>BrasNGA1</i>   | <i>Brachypodium stacei</i>      | Poaceae       | Brast09G182000.1        | Phytozome        |
| <i>BrasNGA2</i>   | <i>Brachypodium stacei</i>      | Poaceae       | Brast04G103000.1        | Phytozome        |
| <i>BrasNGA3</i>   | <i>Brachypodium stacei</i>      | Poaceae       | Brast02G019600.1        | Phytozome        |
| <i>BrasNGA4</i>   | <i>Brachypodium stacei</i>      | Poaceae       | Brast03G184100.1        | Phytozome        |
| <i>BrasNGA5</i>   | <i>Brachypodium stacei</i>      | Poaceae       | Brast01G176300.1        | Phytozome        |
| <i>BrasNGA6</i>   | <i>Brachypodium stacei</i>      | Poaceae       | Brast05G016300.1        | Phytozome        |
| <i>BrasNGA7</i>   | <i>Brachypodium stacei</i>      | Poaceae       | Brast07G005200.1        | Phytozome        |
|                   |                                 |               |                         |                  |
|                   |                                 |               |                         |                  |
|                   | <b>Basal Eudicots</b>           |               |                         |                  |
| <b>Gene name</b>  | <b>Species</b>                  | <b>Family</b> | <b>Accession number</b> | <b>Data Base</b> |
| <i>AqcoeNGA1</i>  | <i>Aquilegia coerulea</i>       | Ranunculaceae | Aqcoe5G472800.1         | Phytozome        |
| <i>EschcaNGA1</i> | <i>Eschscholzia californica</i> | Papaveraceae  | EVOD-2110824            | OneKP            |
| <i>NenuNGA1</i>   | <i>Nelumbo nucifera</i>         | Nelumbonaceae | XM_010252998.2          | NCBI             |
| <i>NenuNGA2</i>   | <i>Nelumbo nucifera</i>         | Nelumbonaceae | XM_010242757.2          | NCBI             |
|                   |                                 |               |                         |                  |
|                   |                                 |               |                         |                  |
|                   | <b>Core Eudicots</b>            |               |                         |                  |
| <b>Gene name</b>  | <b>Species</b>                  | <b>Family</b> | <b>Accession number</b> | <b>Data Base</b> |
| <i>NitabNGA1</i>  | <i>Nicotiana tabacum</i>        | Solanaceae    | XM_016610765.1          | NCBI             |
| <i>NitabNGA2</i>  | <i>Nicotiana tabacum</i>        | Solanaceae    | XM_016641154.1          | NCBI             |
| <i>NitabNGA3</i>  | <i>Nicotiana tabacum</i>        | Solanaceae    | XM_016655383.1          | NCBI             |
| <i>NitabNGA4</i>  | <i>Nicotiana tabacum</i>        | Solanaceae    | XM_016656424.1          | NCBI             |
| <i>SoltuNGA1</i>  | <i>Solanum tuberosum</i>        | Solanaceae    | XM_006343694.2          | NCBI             |
| <i>SoltuNGA2</i>  | <i>Solanum tuberosum</i>        | Solanaceae    | XM_006352159.2          | NCBI             |
| <i>SoltuNGA3</i>  | <i>Solanum tuberosum</i>        | Solanaceae    | XM_006352237.2          | NCBI             |
| <i>SolyNGA1</i>   | <i>Solanum lycopersicum</i>     | Solanaceae    | Solyc08g083400.2.1      | Phytozome        |
| <i>SolyNGA3</i>   | <i>Solanum lycopersicum</i>     | Solanaceae    | Solyc08g013700.1.1      | Phytozome        |
| <i>AtNGA1</i>     | <i>Arabidopsis thaliana</i>     | Brassicaceae  | AT2G46870               | TAIR             |
| <i>AtNGA2</i>     | <i>Arabidopsis thaliana</i>     | Brassicaceae  | AT3G61970               | TAIR             |
| <i>AtNGA3</i>     | <i>Arabidopsis thaliana</i>     | Brassicaceae  | AT1G01030               | TAIR             |
| <i>AtNGA4</i>     | <i>Arabidopsis thaliana</i>     | Brassicaceae  | AT4G01500               | TAIR             |
| <i>AlyrNGA1</i>   | <i>Arabidopsis lyrata</i>       | Brassicaceae  | AL181U10040.t1          | Phytozome        |
| <i>AlyrNGA2</i>   | <i>Arabidopsis lyrata</i>       | Brassicaceae  | AL4G46330.t1            | Phytozome        |
| <i>AlyrNGA3</i>   | <i>Arabidopsis lyrata</i>       | Brassicaceae  | AL5G44580.t1            | Phytozome        |
| <i>AlyrNGA4</i>   | <i>Arabidopsis lyrata</i>       | Brassicaceae  | AL1G11500.t1            | Phytozome        |
| <i>AlyrNGA5</i>   | <i>Arabidopsis lyrata</i>       | Brassicaceae  | AL6G51880.t1            | Phytozome        |
| <i>CapruNGA1</i>  | <i>Capsella rubella</i>         | Brassicaceae  | Carubv10023656m         | Phytozome        |
| <i>CapruNGA2</i>  | <i>Capsella rubella</i>         | Brassicaceae  | Carubv10017696m         | Phytozome        |
| <i>CapruNGA3</i>  | <i>Capsella rubella</i>         | Brassicaceae  | Carubv10009540m         | Phytozome        |
| <i>CapruNGA4</i>  | <i>Capsella rubella</i>         | Brassicaceae  | Carubv10001406m         | Phytozome        |

| <i>HECATE</i> sequences  |                                   |                  |                           |                  |
|--------------------------|-----------------------------------|------------------|---------------------------|------------------|
| <b>Outgroup</b>          |                                   |                  |                           |                  |
| <b>Gene name</b>         | <b>Species</b>                    | <b>Family</b>    | <b>Accession number</b>   | <b>Data Base</b> |
| <i>AtbHLH87</i>          | <i>Arabidopsis thaliana</i>       | Brassicaceae     | AF488617.1                | NCBI             |
| <b>Basal Angiosperms</b> |                                   |                  |                           |                  |
| <b>Gene name</b>         | <b>Species</b>                    | <b>Family</b>    | <b>Accession number</b>   | <b>Data Base</b> |
| <i>AmtrHEC1</i>          | <i>Amborella trichopoda</i>       | Amborellaceae    | XM_006827995.3            | NCBI             |
| <i>AmtrHEC2</i>          | <i>Amborella trichopoda</i>       | Amborellaceae    | XM_006852430.2            | NCBI             |
| <i>AmtrHEC3</i>          | <i>Amborella trichopoda</i>       | Amborellaceae    | XM_006858410.3            | NCBI             |
| <i>AfimHEC1</i>          | <i>Aristolochia fimbriata</i>     | Aristolochiaceae | MN709131                  | NCBI             |
| <i>AfimHEC3</i>          | <i>Aristolochia fimbriata</i>     | Aristolochiaceae | MN709132                  | NCBI             |
| <i>AmacHEC1</i>          | <i>Aristolochia macrophylla</i>   | Aristolochiaceae | MN709142                  | NCBI             |
| <i>AmanHEC1</i>          | <i>Aristolochia manshuriensis</i> | Aristolochiaceae | MN709146                  | NCBI             |
| <i>AeurHEC1</i>          | <i>Asarum europaeum</i>           | Aristolochiaceae | MN709138                  | NCBI             |
| <i>AeurHEC3</i>          | <i>Asarum europaeum</i>           | Aristolochiaceae | MN709139                  | NCBI             |
| <i>SaheHEC1</i>          | <i>Saruma henryi</i>              | Aristolochiaceae | MN709153                  | NCBI             |
| <b>Monocots</b>          |                                   |                  |                           |                  |
| <b>Gene name</b>         | <b>Species</b>                    | <b>Family</b>    | <b>Accession number</b>   | <b>Data Base</b> |
| <i>OrothHEC1</i>         | <i>Oropetium thomaeum</i>         | Poaceae          | Oropetium_20150105_05690A | Phytozome        |
| <i>OrothHEC2</i>         | <i>Oropetium thomaeum</i>         | Poaceae          | Oropetium_20150105_20418A | Phytozome        |
| <i>OrothHEC3</i>         | <i>Oropetium thomaeum</i>         | Poaceae          | Oropetium_20150105_13681A | Phytozome        |
| <i>OrysaHEC1</i>         | <i>Oryza sativa</i>               | Poaceae          | LOC_Os08g36740.1          | Phytozome        |
| <i>OrysaHEC1-2</i>       | <i>Oryza sativa</i>               | Poaceae          | LOC_Os08g36740.1          | Phytozome        |
| <i>OrysaHEC2</i>         | <i>Oryza sativa</i>               | Poaceae          | LOC_Os08g01700.1          | Phytozome        |
| <i>OrysaHEC3</i>         | <i>Oryza sativa</i>               | Poaceae          | LOC_Os09g28210.1          | Phytozome        |
| <b>Basal Eudicots</b>    |                                   |                  |                           |                  |
| <b>Gene name</b>         | <b>Species</b>                    | <b>Family</b>    | <b>Accession number</b>   | <b>Data Base</b> |
| <i>AqcoeHEC1</i>         | <i>Aquilegia coerulea</i>         | Ranunculaceae    | Aqcoe6G096700.1           | Phytozome        |
| <i>AqcoeHEC2</i>         | <i>Aquilegia coerulea</i>         | Ranunculaceae    | Aqcoe6G096700.2           | Phytozome        |
| <i>AqcoeHEC3</i>         | <i>Aquilegia coerulea</i>         | Ranunculaceae    | Aqcoe5G239900.1           | Phytozome        |
| <i>NenuHEC1</i>          | <i>Nelumbo nucifera</i>           | Nelumbonaceae    | LOC104601763              | Phytozome        |
| <i>NenuHEC2</i>          | <i>Nelumbo nucifera</i>           | Nelumbonaceae    | LOC104606174              | Phytozome        |
| <i>NenuHEC3</i>          | <i>Nelumbo nucifera</i>           | Nelumbonaceae    | LOC104589283              | Phytozome        |
| <b>Core Eudicots</b>     |                                   |                  |                           |                  |
| <b>Gene name</b>         | <b>Species</b>                    | <b>Family</b>    | <b>Accession number</b>   | <b>Data Base</b> |
| <i>AthaHEC1</i>          | <i>Arabidopsis thaliana</i>       | Brassicaceae     | AT5G67060                 | TAIR             |
| <i>AthaHEC2</i>          | <i>Arabidopsis thaliana</i>       | Brassicaceae     | AT3G50330                 | TAIR             |
| <i>AthaHEC3</i>          | <i>Arabidopsis thaliana</i>       | Brassicaceae     | AT5G09750                 | TAIR             |
| <i>AlyrHEC1</i>          | <i>Arabidopsis lyrata</i>         | Brassicaceae     | XM_021012347.1            | Phytozome        |
| <i>AlyrHEC2</i>          | <i>Arabidopsis lyrata</i>         | Brassicaceae     | XM_021012353.1            | Phytozome        |
| <i>AlyrHEC3</i>          | <i>Arabidopsis lyrata</i>         | Brassicaceae     | XM_021023153.1            | Phytozome        |
| <i>CapruHEC1</i>         | <i>Capsella rubella</i>           | Brassicaceae     | XM_006281680.2            | Phytozome        |
| <i>CapruHEC2</i>         | <i>Capsella rubella</i>           | Brassicaceae     | XM_006292743.1            | Phytozome        |
| <i>CapruHEC3</i>         | <i>Capsella rubella</i>           | Brassicaceae     | XM_006290147.2            | Phytozome        |

|                 |                           |           |                |           |
|-----------------|---------------------------|-----------|----------------|-----------|
| <i>EucgHEC1</i> | <i>Eucalyptus grandis</i> | Myrtaceae | Eucgr.H01682.1 | Phytozome |
| <i>EucgHEC2</i> | <i>Eucalyptus grandis</i> | Myrtaceae | XM_010028135.1 | NCBI      |
| <i>EucgHEC3</i> | <i>Eucalyptus grandis</i> | Myrtaceae | XM_010029062.1 | NCBI      |
| <i>VitvHEC1</i> | <i>Vitis vinifera</i>     | Vitaceae  | XM_002277814.3 | NCBI      |
| <i>VitvHEC3</i> | <i>Vitis vinifera</i>     | Vitaceae  | XM_002275105.3 | NCBI      |

**Table S3. Primers used in this study.** Gene specific primers used in this study to amplify *AfimCRC*, *AfimSPT*, *AfimNGA*, and *AfimHEC1*, and *AfimHEC3* orthologs in *Aristolochia fimbriata*, using reverse transcription polymerase chain reaction (RT-PCR), quantitative reverse transcription (qRT-PCR), and *in situ* hybridization (ISH) experiments.

| <b>Primer name (RT-PCR)</b>  | <b>Primer sequence (5' - 3')</b>            |
|------------------------------|---------------------------------------------|
| <i>AfimCRC</i> Fwd           | ATGAAAATTGGAGGCTTTTCC                       |
| <i>AfimCRC</i> Rev           | GGATCCATCAGTACCCATGTGATC                    |
| <i>AfimSPT</i> Fwd           | GAATTCATGTACGGGAAGATATGCTCG                 |
| <i>AfimSPT</i> Rev           | GGATCCTCAAATTTTAATGCTTC                     |
| <i>AfimNGA</i> Fwd           | CCATGGACAGTAGTTGTATCGAGG                    |
| <i>AfimNGA</i> Rev           | GGATCCTTACAAGGCTCCGACACA                    |
| <i>AfimHEC1</i> Fwd          | CATATGGAAGGTCACGAGCTGGTA                    |
| <i>AfimHEC1</i> Rev          | GAATTCTCAGCTGAGCAAGTGGGT                    |
| <i>AfimHEC3</i> Fwd          | CATATGAAGGAAATGATGTACAAA                    |
| <i>AfimHEC3</i> Rev          | GAATTCTCACTGATGTTTCATTA                     |
| <i>AfimACTINA</i> Fwd        | GGTTGGGATGGGTCAGAAGG                        |
| <i>AfimACTINA</i> Rev        | ACTTGCCCATCAGGAAGCTC                        |
| <b>Primer name (qRT-PCR)</b> |                                             |
| <i>AfimCRC</i> Fwd           | GAAATGTGGCCACTGTGGTA                        |
| <i>AfimCRC</i> Rev           | GCTGGGTAGTCGTTGGAGAA                        |
| <i>AfimSPT</i> Fwd           | AGTGTCCACTTCTGATAGGCA                       |
| <i>AfimSPT</i> Rev           | CTCTCCCACTTCGCTCTCAT                        |
| <i>AfimNGA</i> Fwd           | AGCAGCTCTACATCGACTGG                        |
| <i>AfimNGA</i> Rev           | GCTCCGACACATTGCTTCTT                        |
| <i>AfimUBC</i> Fwd           | TGGGTCCTCCTGATAGTCCA                        |
| <i>AfimUBC</i> Rev           | AGAGATGGTGAGTGCTGGAC                        |
| <b>Primername (ISH)</b>      |                                             |
| <i>AfimCRC</i> Fwd           | TGTCTGGCCATGGAGTTC                          |
| <i>AfimCRC</i> Rev           | CTTAATACGACTCACTATAGGGCTGGAGGCTTCTCCTCAT    |
| <i>AfimSPT</i> Fwd           | CAAATGTCCCAGATGCGCATA                       |
| <i>AfimSPT</i> Rev           | CTTAATACGACTCACTATAGGGGTGTCCCTTCCCAGAGTG    |
| <i>AfimNGA</i> Fwd           | GTATCGCCGCGTTGAGT                           |
| <i>AfimNGA</i> Rev           | CTTAATACGACTCACTATAGGGCTCGTCTTCCGTCTCCGA    |
| <i>AfimHEC1</i> Fwd          | TTGTAGTGTCTACGACTCCATCC                     |
| <i>AfimHEC1</i> Rev          | CTTAATACGACTCACTATAGGGCGCCCAATTCCGTTACACTA  |
| <i>AfimHEC3</i> Fwd          | GCCACCATGCTTGACGAA                          |
| <i>AfimHEC3</i> Rev          | CTTAATACGACTCACTATAGGGTAATTCGTAGTCTTGGTGGTG |



**Figure S1.** Maximum likelihood (ML) phylogenetic analysis of the *CRC* gene lineage in flowering plants. The outgroup used was the *Amborella trichopoda* *AmtrCRC*. Bootstrap (BS) supports shown above the nodes. Colors follow conventions on the figure.

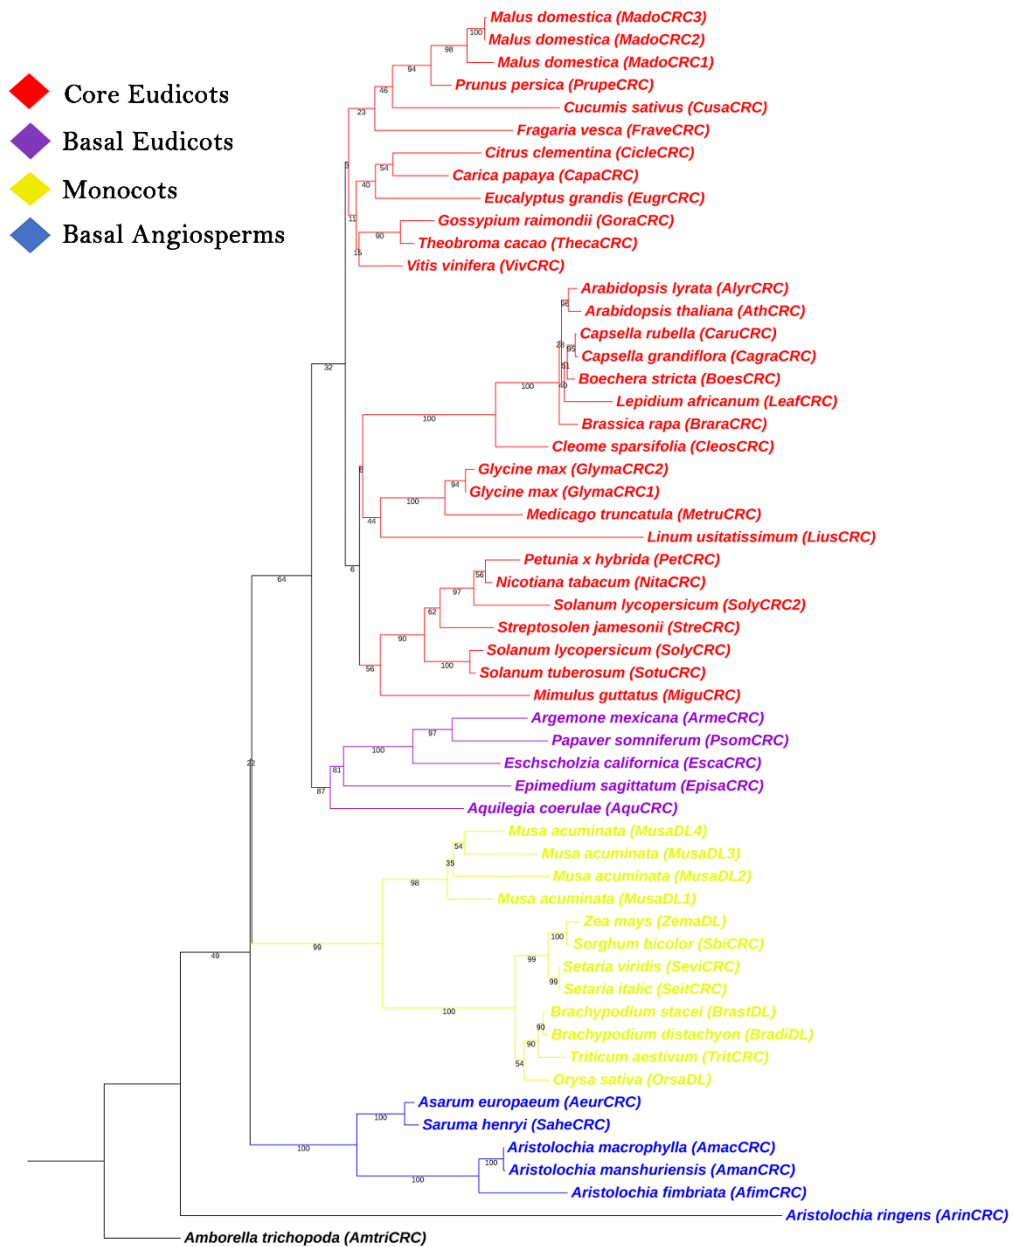

**Figure S2.** Maximum likelihood (ML) phylogenetic analysis of the *SPT* gene lineage in flowering plants. Outgroup used was *Cycas micholitzii SPT*. Star points to a duplication event. BS supports shown in the nodes. Colors follow conventions on the figure.

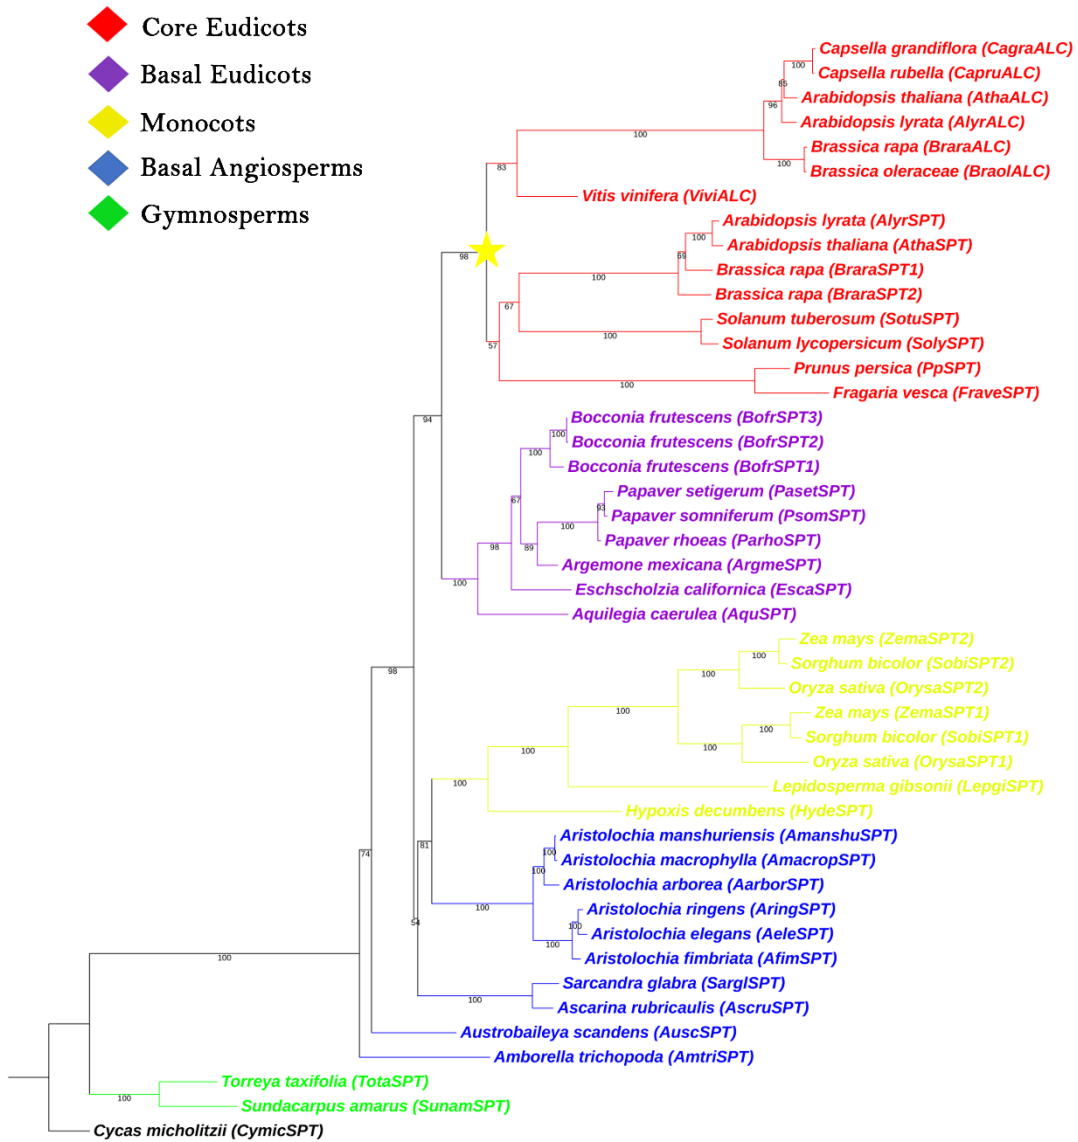

**Figure S3.** Maximum likelihood (ML) phylogenetic analysis of the *NGA* gene lineage in flowering plants. The outgroup used was *Arabidopsis thaliana RAV*. Star points to a duplication event. BS supports shown in the nodes. Colors follow conventions on the figure.

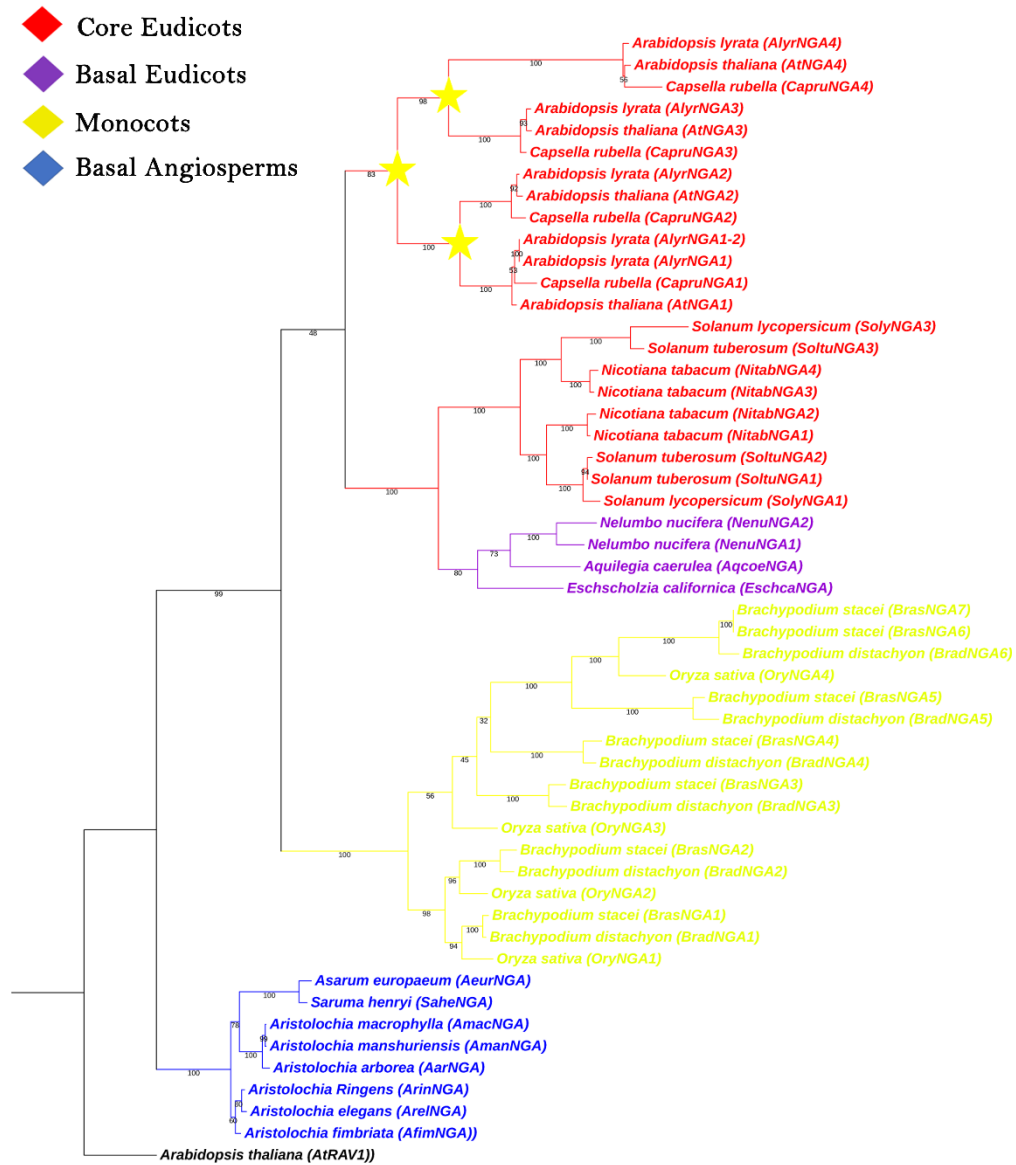

**Figure S4.** Maximum likelihood (ML) phylogenetic analysis of the *HEC* gene lineage in flowering plants. Outgroup used was *Arabidopsis thaliana bHLH87*. Star points to a duplication event. BS supports shown in the nodes. Colors follow conventions on the figure.

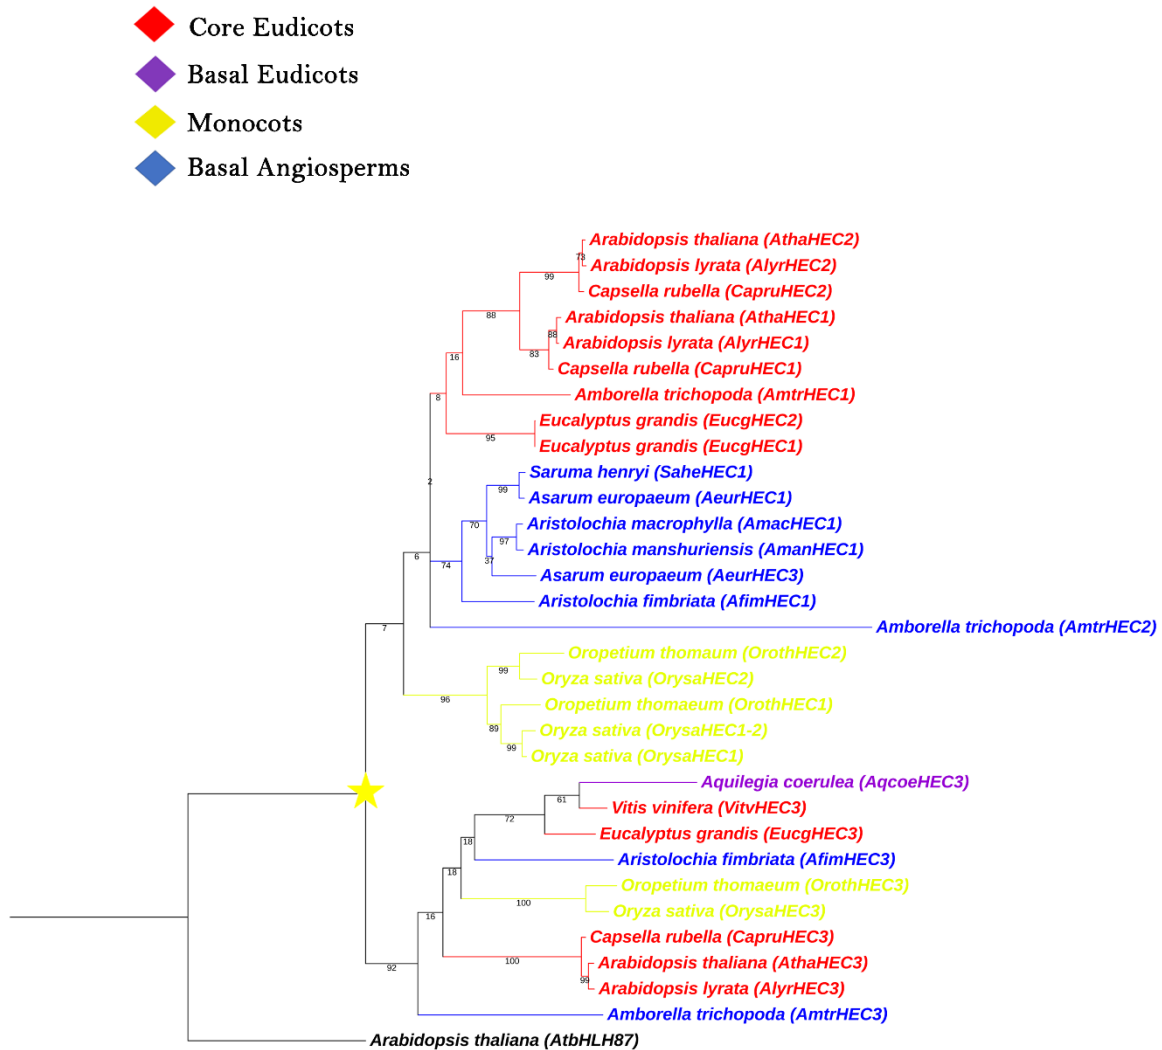

**Figure S5.** Relative expression profiles of *AfimCRC*, *AfimSPT* and *AfimNGA* at different floral developmental stages, and leaves using standard qRT-PCR. Ubiquitin (*AfimUBC*) was used as a positive control. Abbreviations: **S5**, stage 5 of the floral bud, when stigmatic lobes are fully developed. **S7**, stage 7 of the floral bud, when the stigmatic lobes grow above the anthers and the ovules initiate to develop. **S9**, stage 9 of the floral bud, when ovules develop the two integuments. **L**, leaf; **A**, Shoot apex with early floral buds (developmental stages S1- S4); **Ov**, Ovary; **Gy**, gynostemium; **-C** indicates the amplification reaction loaded without cDNA.

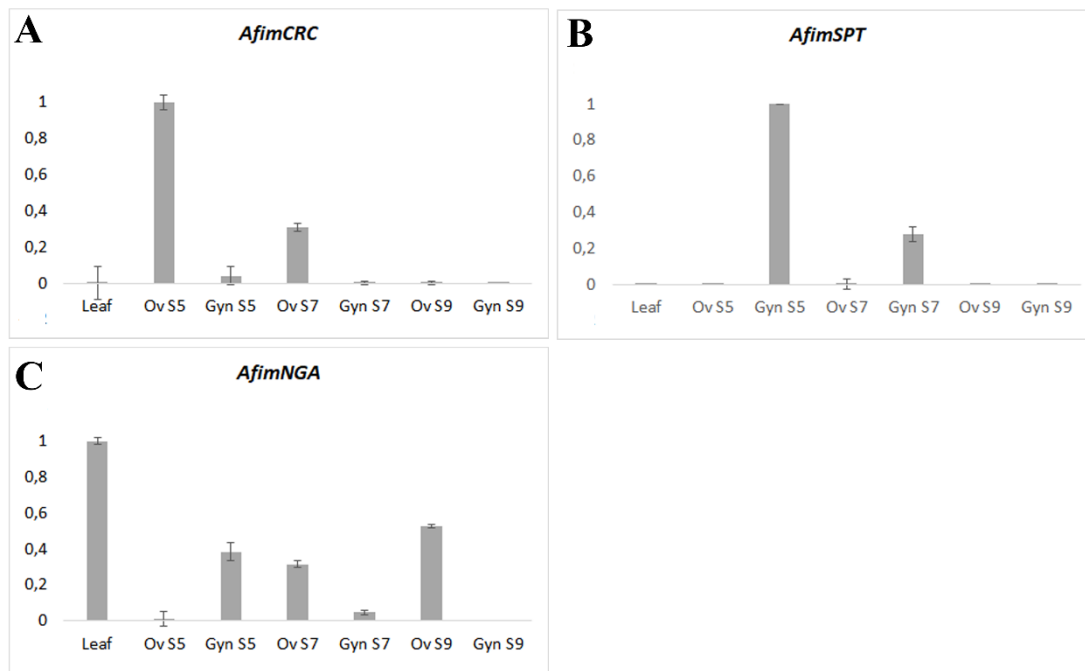

**Figure S6.** *In situ* hybridization with sense probes for all tested genes in *Aristolochia fimbriata* resulted in no signal. **A** *AfimCRC* in floral bud at S5 **B** *AfimNGA* in transverse section of a gynostemium at S9 **C** *AfimSPT* in a floral bud at S4 **D** *AfimHEC1* in flowering shoot apex in longitudinal section **E** *AfimHEC3* in flowering shoot apex in longitudinal section. Abbreviations: **ab**, accessory bud; **l**, leaf; **ov**, ovary; **p**, perianth. Black arrows (**D**, **E**) points to the shoot apical meristem; black arrowheads (**A-C**) point to stamens or stamen primordia; asterisks (\*) (**A**, **C**) point to stigmatic lobes. White arrows (**A**) indicate the putative style. Scale bars: 40  $\mu$ m in **A**, **B**; 100  $\mu$ m in **C**, **E**; 200  $\mu$ m in **D**.

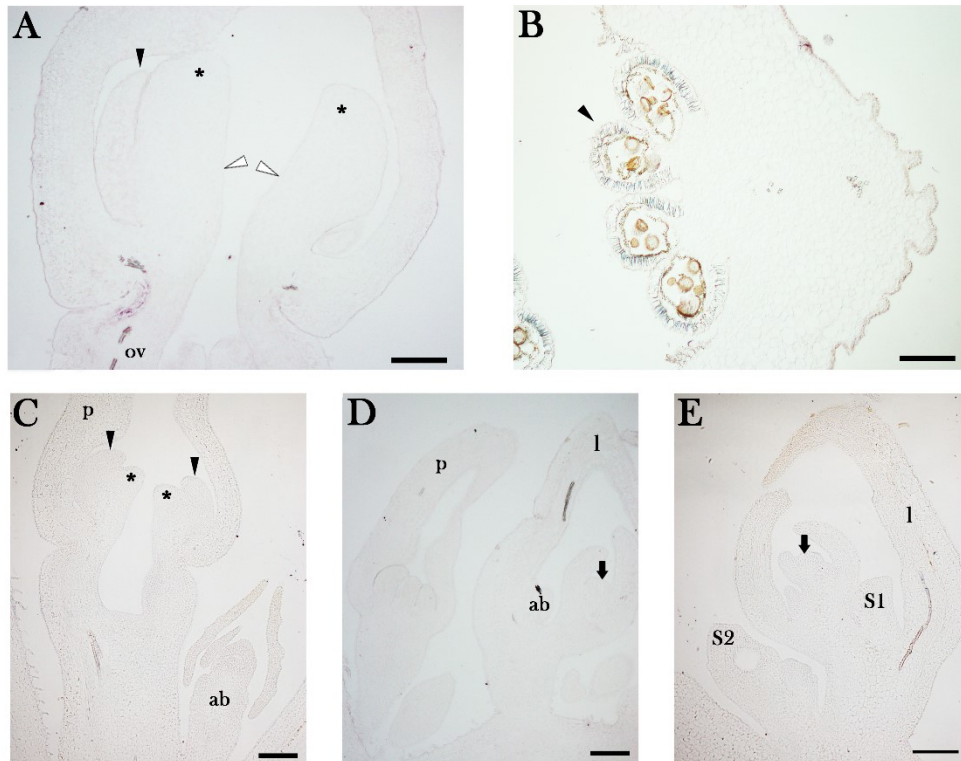

Supplement: 13227_2020_149_MOESM1_ESM.pdf [file 13227_2020_149_MOESM1_ESM.pdf]
